# Supplementary material for: Environment-sensitive amphiphilic fluorophore for selective sensing of protein
Source: Royal Society of Chemistry journal article supplement (doi:10.1039/c0pp00299b), 2011-01-17
Supplement: c0pp00299b.pdf [file c0pp00299b.pdf]

# **Environment-Sensitive Amphiphilic Fluorophore For Selective Sensing of Protein**

Bimlesh Ojha, Gopal Das\*

Department of Chemistry, Indian Institute of Technology Guwahati, Assam – 781 039, India

E-mail: [gdas@iitg.ernet.in](mailto:gdas@iitg.ernet.in); Tel: +91 361 2582313; Fax: +91 361 2582349

**Supplementary Information**

*Characterization.* NMR spectra were recorded on a Varian FT-400 MHz instrument. The chemical shifts were recorded in parts per million (ppm) scale using tetramethylsilane (TMS) as a reference at 298 K.

**Compound 1** [8-(butoxy)quinoline]:  $^1\text{H}$  NMR (400 MHz,  $\text{CDCl}_3$ ):  $\delta$  1.009 (t, 3H), 1.559 (m, 2 H), 2.019 (m, 2H), 4.238 (t, 2H), 7.056 (m, ArH), 7.409 (m, ArH), 8.114 (m, ArH), 8.941 (m, ArH).  $^{13}\text{C}$  NMR (100 MHz,  $\text{CDCl}_3$ ):  $\delta$  13.939, 19.331, 30.981, 68.612, 108.506, 119.289, 212.463, 126.823, 129.440, 135.823, 140.376, 149.843 and 154.843. Light brown color solid, Melting point 48 °C.<sup>1</sup>

**Compound 2** [8-(octyloxy)quinoline]:  $^1\text{H}$  NMR (400 MHz,  $\text{CDCl}_3$ ):  $\delta$  0.854 (t, 3H), 1.328 (m, 10H), 1.478 (t, 2H), 2.007 (t, 2H), 4.205 (m, ArH), 7.032 (m, ArH), 7.384 (m, ArH), 8.094 (m, ArH), 8.921 (m, ArH).  $^{13}\text{C}$  NMR (100 MHz,  $\text{CDCl}_3$ ):  $\delta$  14.137, 22.671, 26.072, 28.978, 29.245, 29.435, 31.830, 68.940, 108.513, 119.305, 121.493, 126.702, 129.455, 135.900 149.208 and 154.813. Deep brown color semi solid at RT.<sup>2</sup>

**Compound 3** [8-(doecyloxy)quinoline]:  $^1\text{H}$  NMR (400 MHz,  $\text{CDCl}_3$ ):  $\delta$  0.837 (t, 3H), 1.178 (m, 18 H), 1.501 (m, 2H), 4.188 (t, 2H), 7.013 (m, ArH), 7.350 (m, ArH), 8.071 (m, ArH), 8.903 (m, ArH).  $^{13}\text{C}$  NMR (100 MHz,  $\text{CDCl}_3$ ):  $\delta$  14.244, 22.816, 26.202, 26.339, 26.393, 29.123, 29.703, 29.764, 29.794, 32.051, 69.161, 108.750, 119.457, 121.623, 126.817, 129.638, 135.999, 149.383 and 155.042. Deep brown color semi solid at RT.<sup>2</sup>

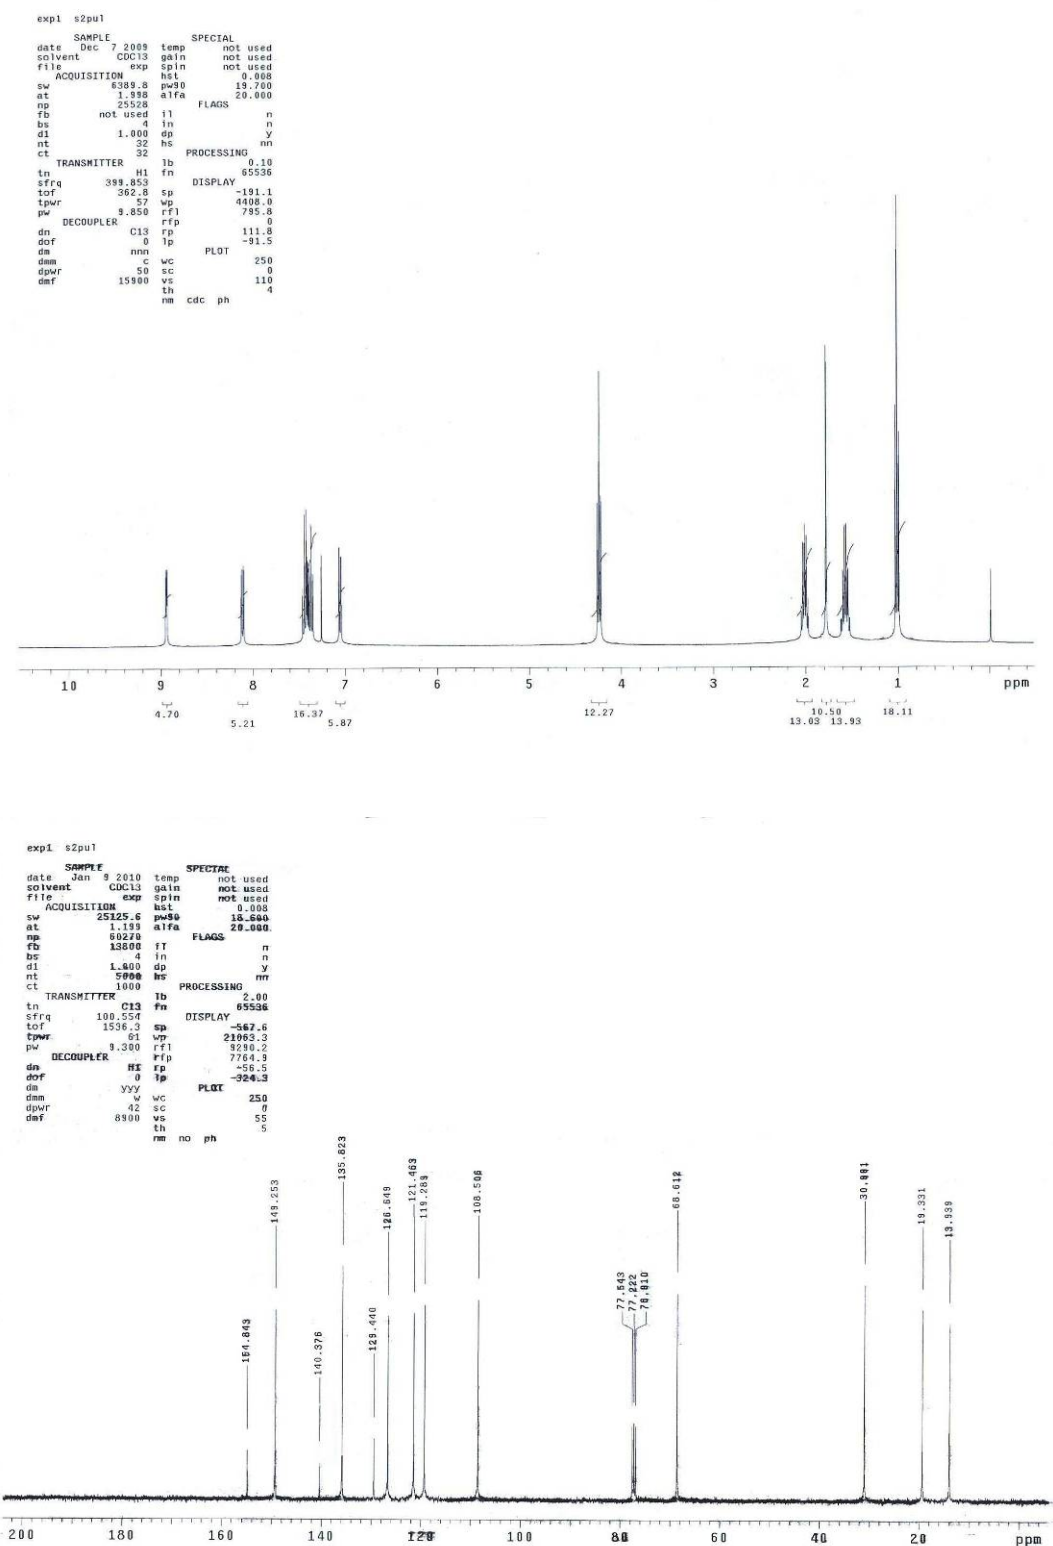Figure S1.  $^1\text{H}$  and  $^{13}\text{C}$  NMR spectra of Compound 1.

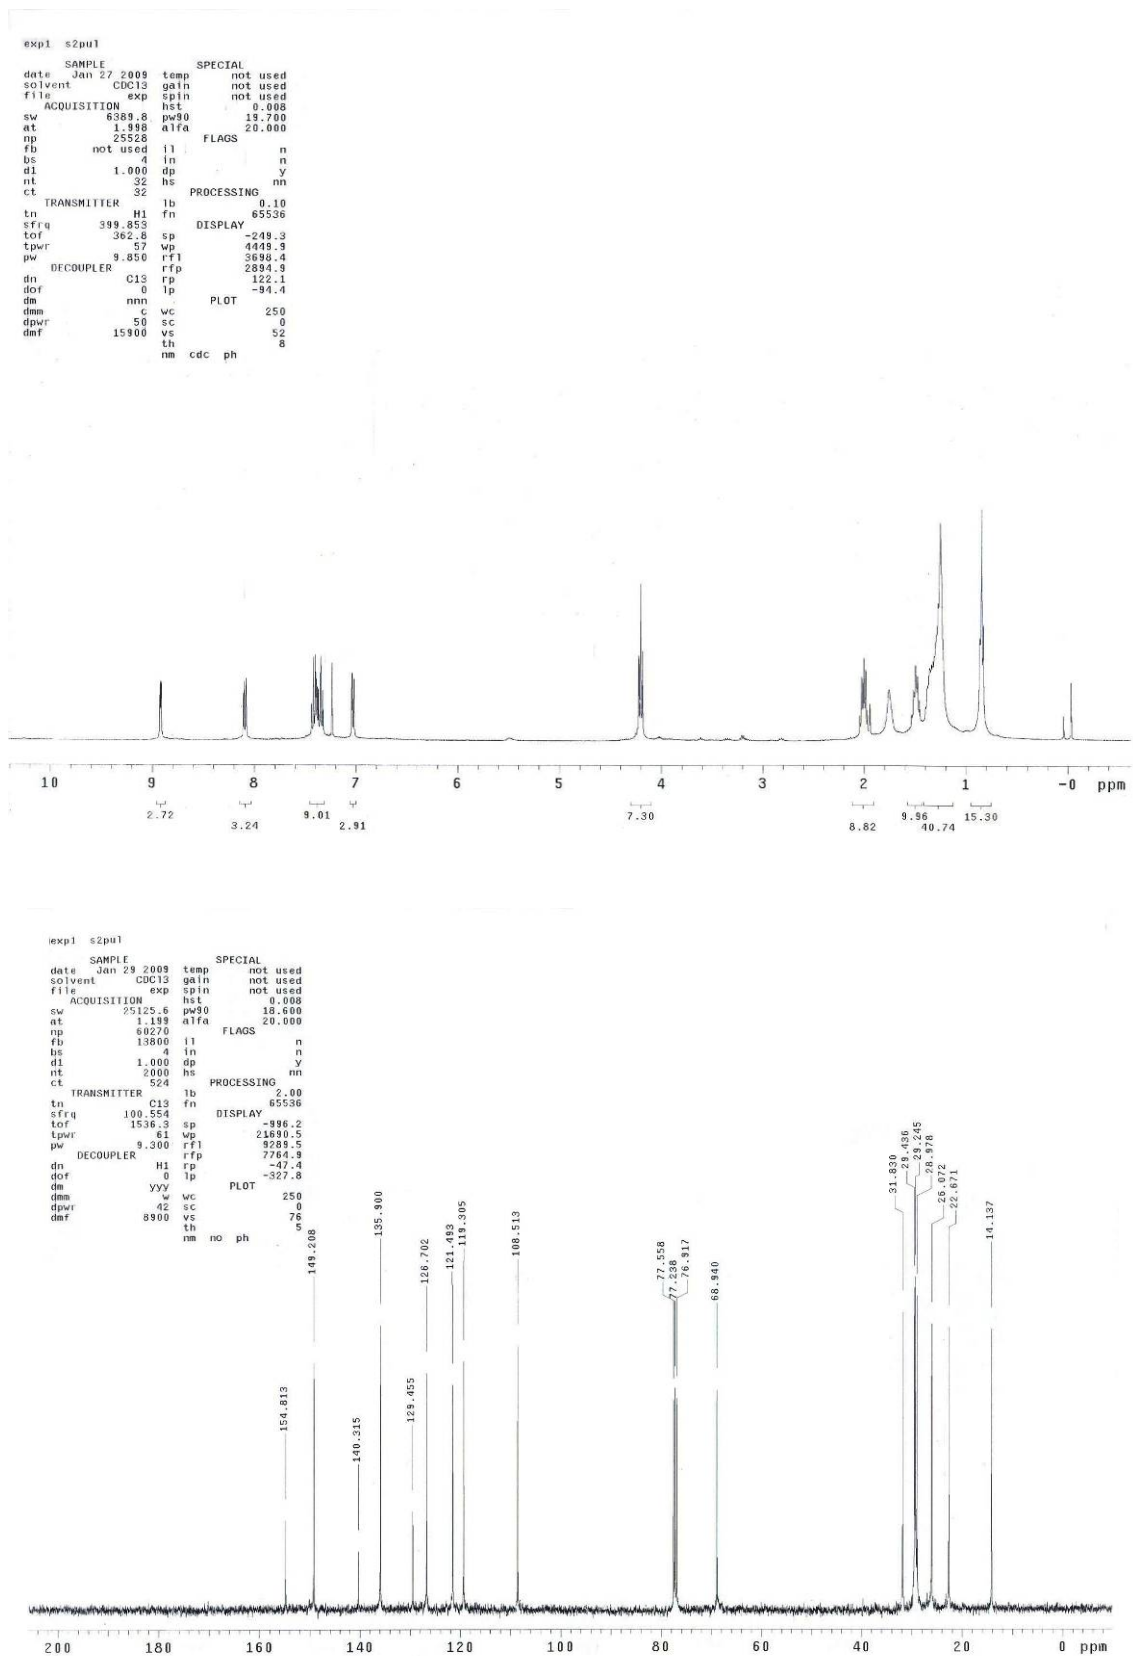Figure S2.  $^1\text{H}$  and  $^{13}\text{C}$  NMR spectra of Compound 2.

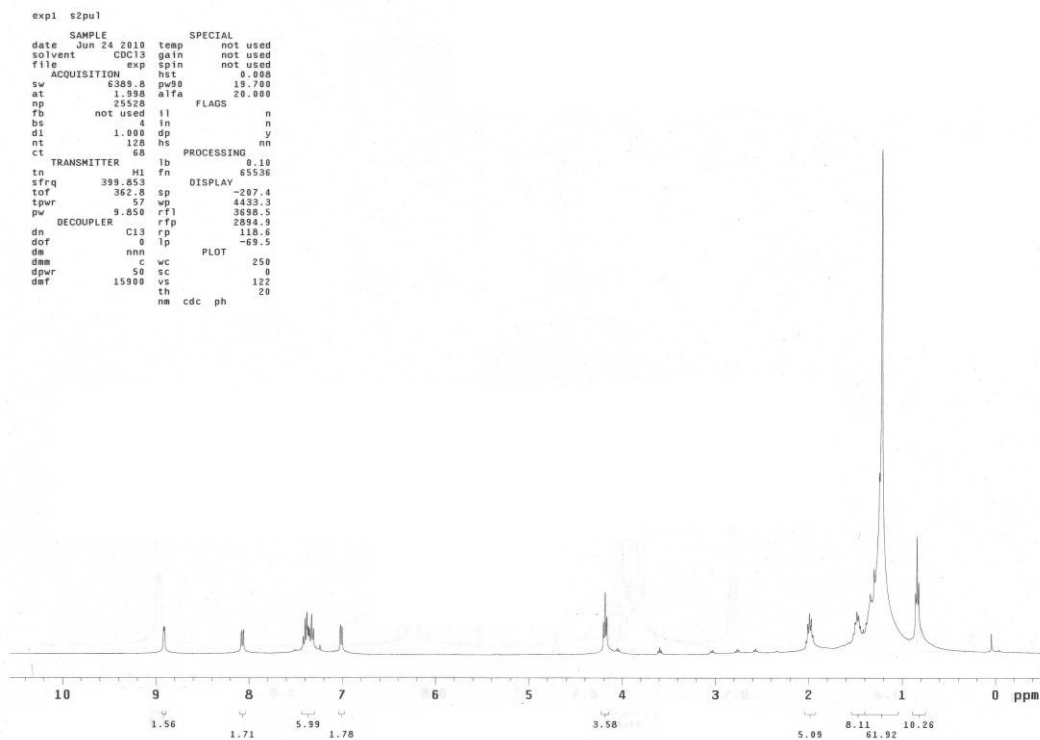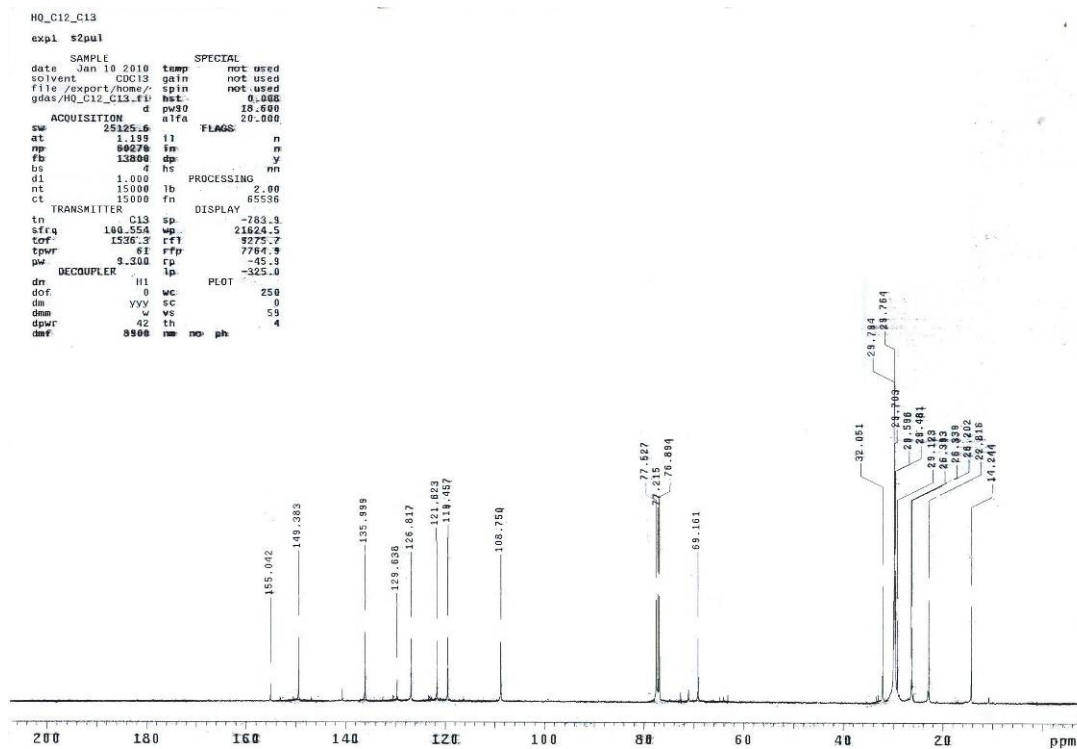Figure S3.  $^1\text{H}$  and  $^{13}\text{C}$  NMR spectra of Compound 3.

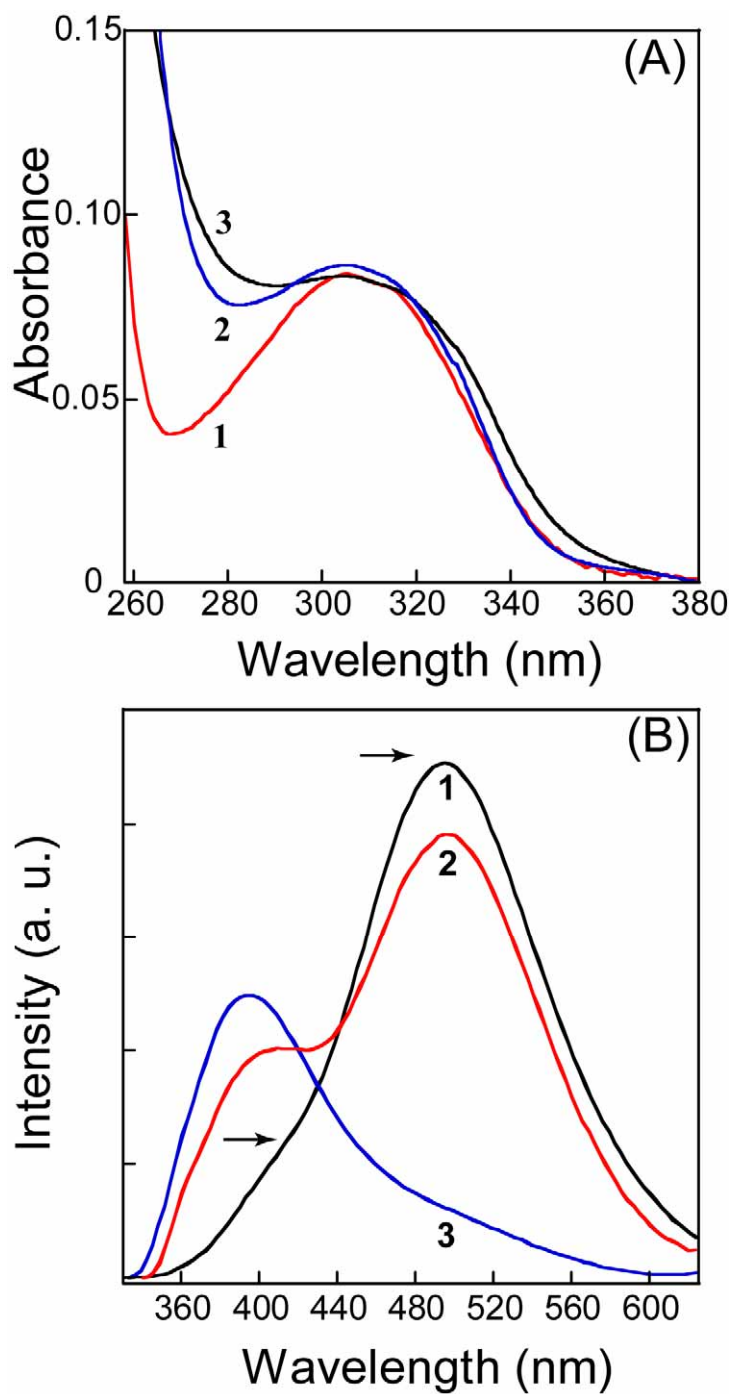

**Figure S4.** (A) UV-visible absorption and (B) Emission spectra of the compounds (1-3) in an aqueous buffer solution of pH 7.0.

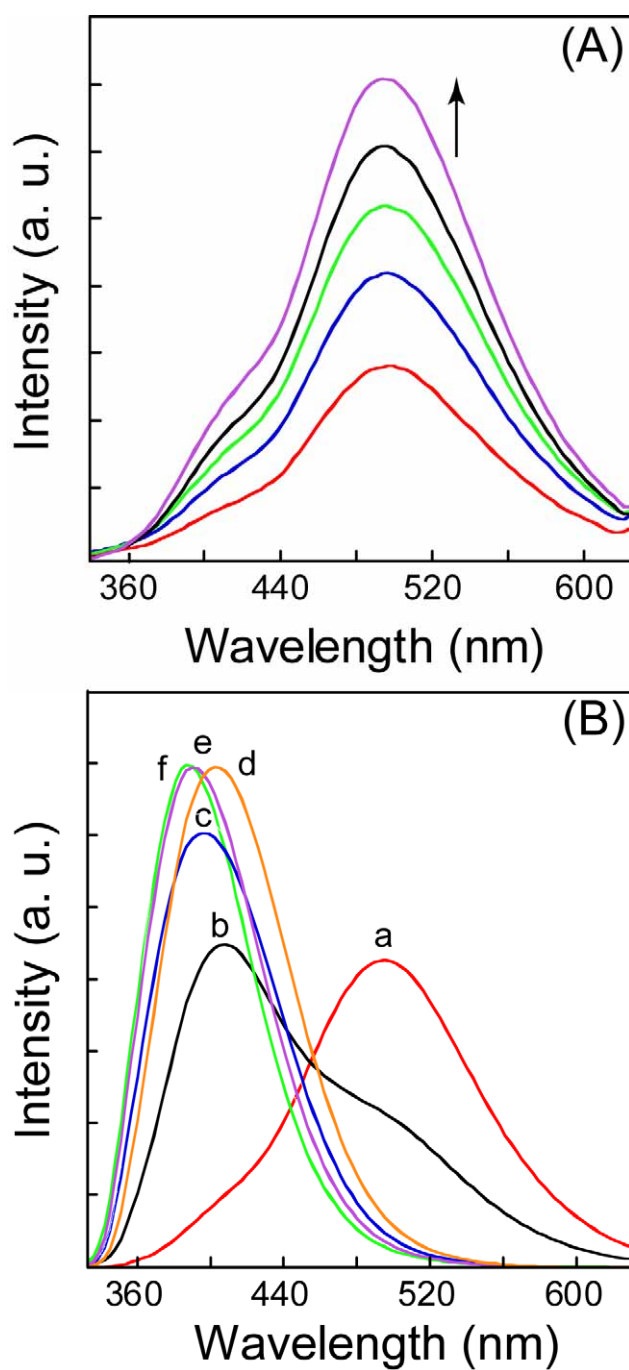

**Figure S5.** (A) Emission spectra of Compound **1** with increasing concentration from 0 to 50  $\mu\text{M}$  and (B) Effect of different solvent on the emission spectra of the compound **1**; Where Trace a-f: water, methanol, DMSO, acetonitrile, THF and hexane.

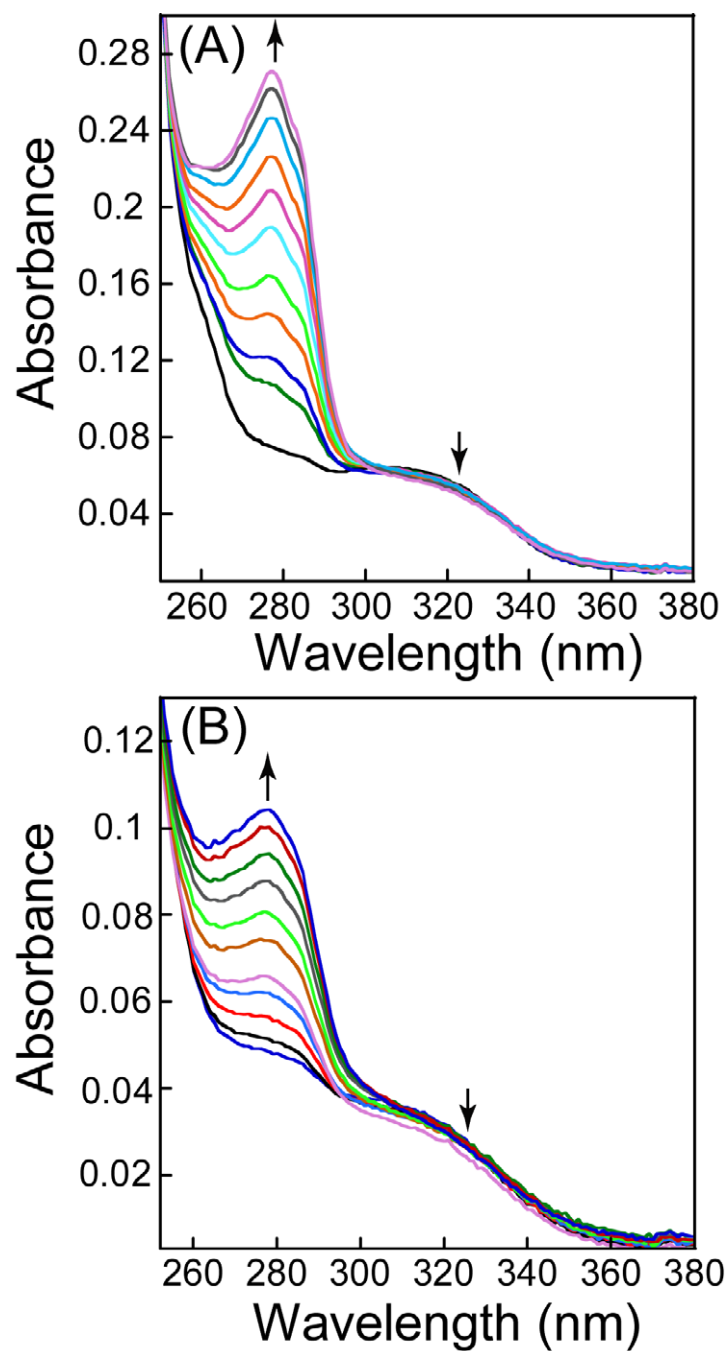

**Figure S6.** Absorption spectra of (A) Compound 2 and (B) Compound 3 as a function of the BSA concentration ranging from 0 to 100  $\mu\text{g/mL}$ .



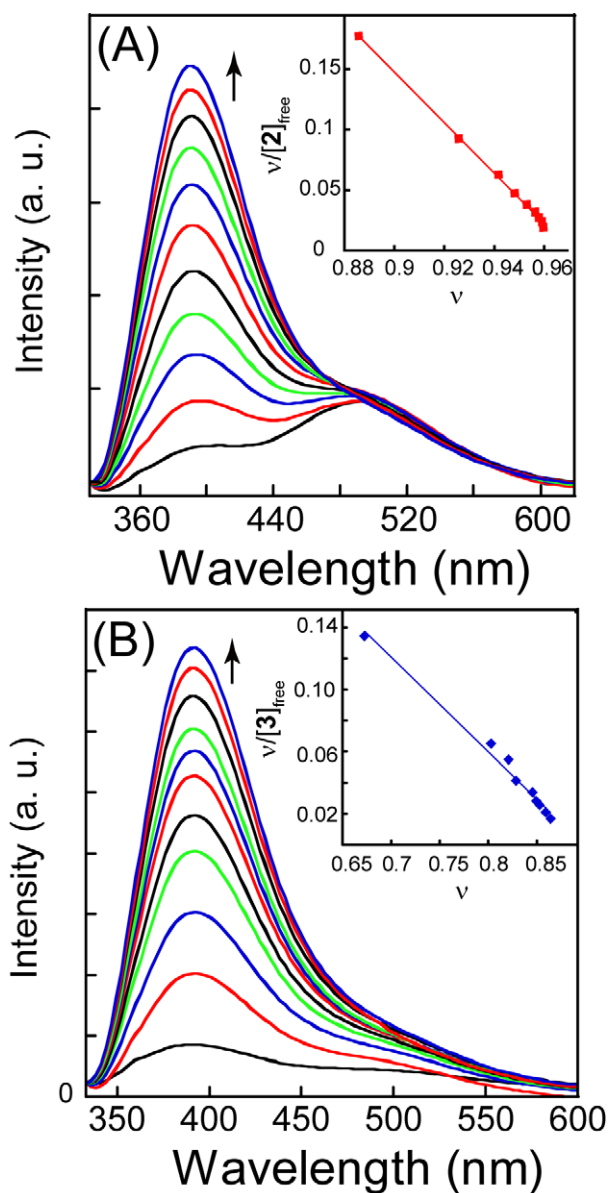

**Figure S7.** Emission spectra of (A) Compound 2 and (B) Compound 3 with increasing concentration of BSA ranging from 0 to 500  $\mu\text{g}/\text{mL}$  in an aqueous buffer of pH 7.0. The compound concentration used was 50  $\mu\text{M}$  and the  $\lambda_{\text{exc}}$  was 320 nm and the inset showing the Schatard plot for binding constant.

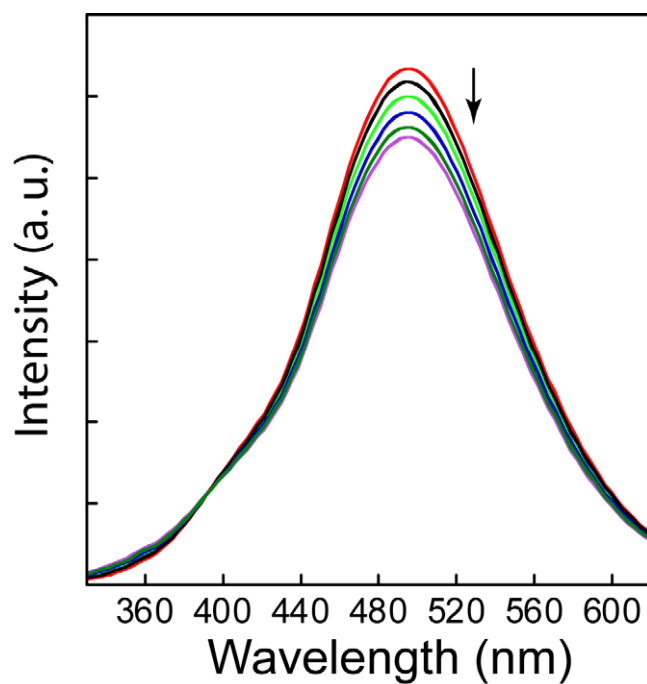

**Figure S8.** (A) Emission spectra of Compound 1 with increasing concentration of tryptophan amino acid from 0 to 500  $\mu\text{g}/\text{mL}$  in an aqueous buffer of pH 7.0.

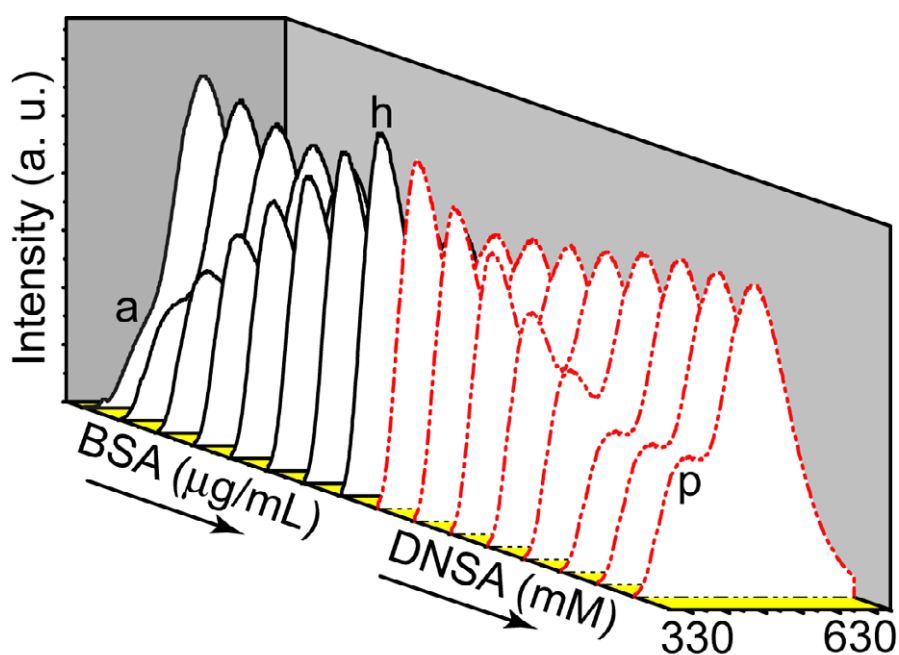

**Figure S9.** Emission spectra of Compound 1 (50  $\mu\text{M}$ ) with increasing concentration of BSA from 0 to 500  $\mu\text{g}/\text{mL}$  (solid black, a-h) and with increasing concentration of DNSA dotted (red, i-p) in an aqueous buffer of pH 7.0.

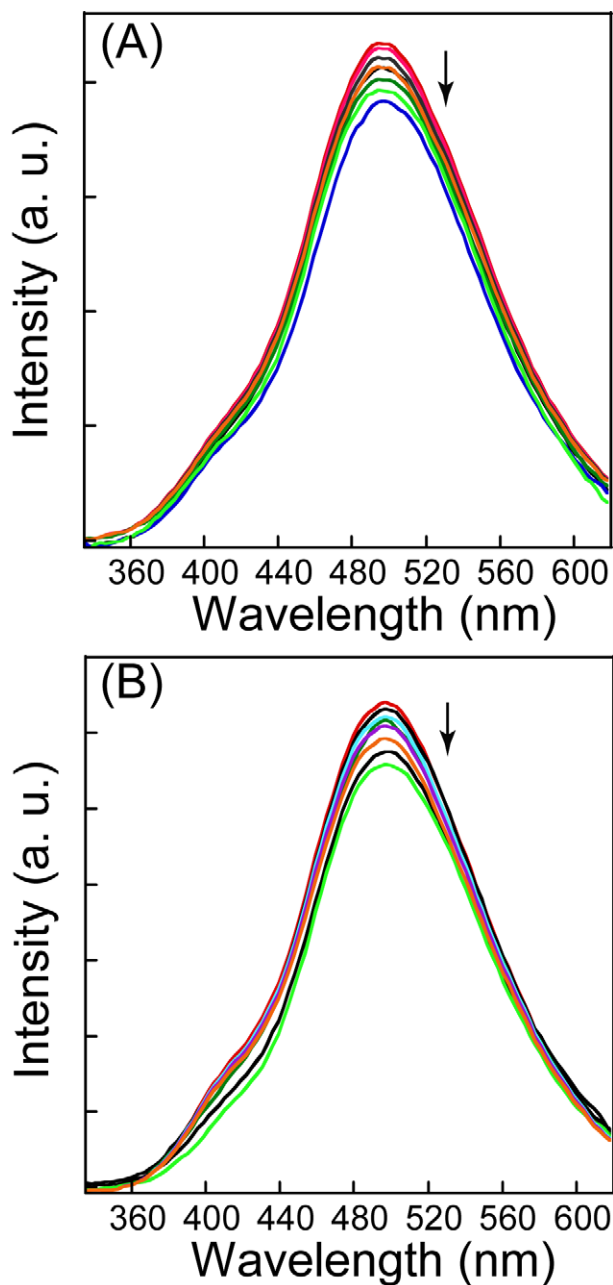

**Figure S10.** Emission spectra of (A) Compound **1** with increasing concentration of lysozyme (0 to 500  $\mu\text{g/mL}$ ) and (B) Compound **1** with increasing concentration of amylase (0 to 500  $\mu\text{g/mL}$ ) in an aqueous buffer of pH 7.0.

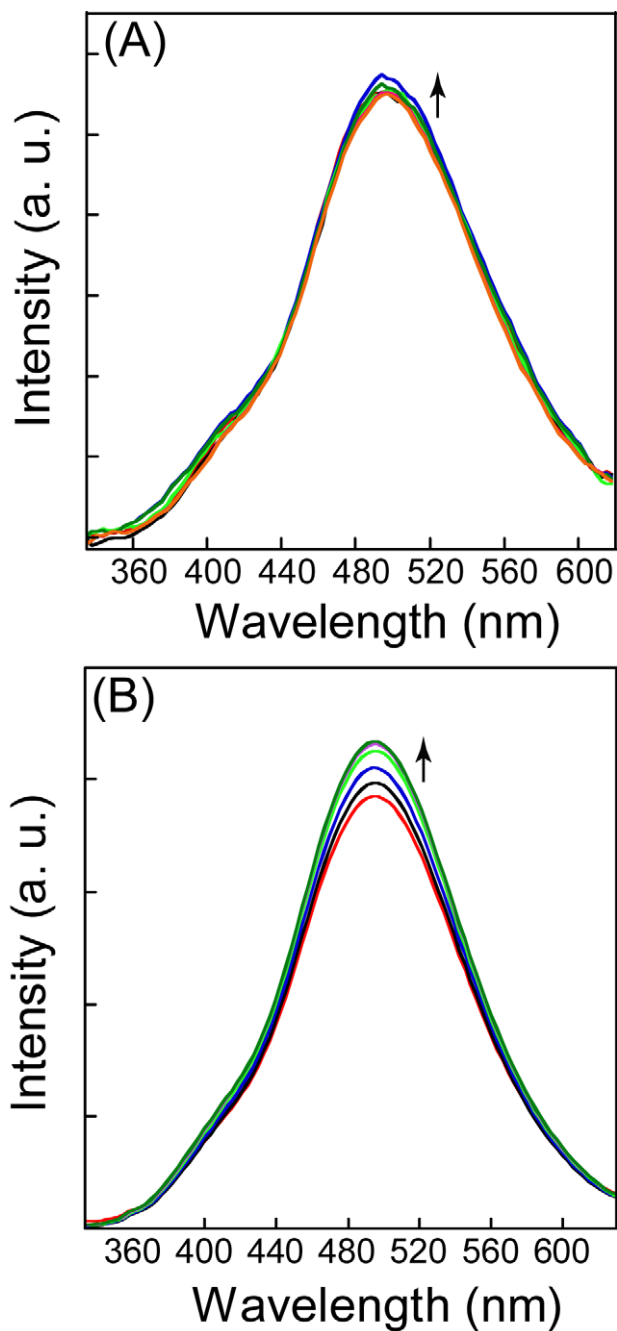

**Figure S11.** Emission spectra of (A) Compound **1** with increasing concentration of AMG (0 to 500 µg/mL) and (B) Compound **1** with increasing concentration of proteinase K (0 to 500 µg/mL) in an aqueous buffer of pH 7.0. The compound concentration used was 50 µM and the  $\lambda_{\text{exc}}$  was 320 nm.

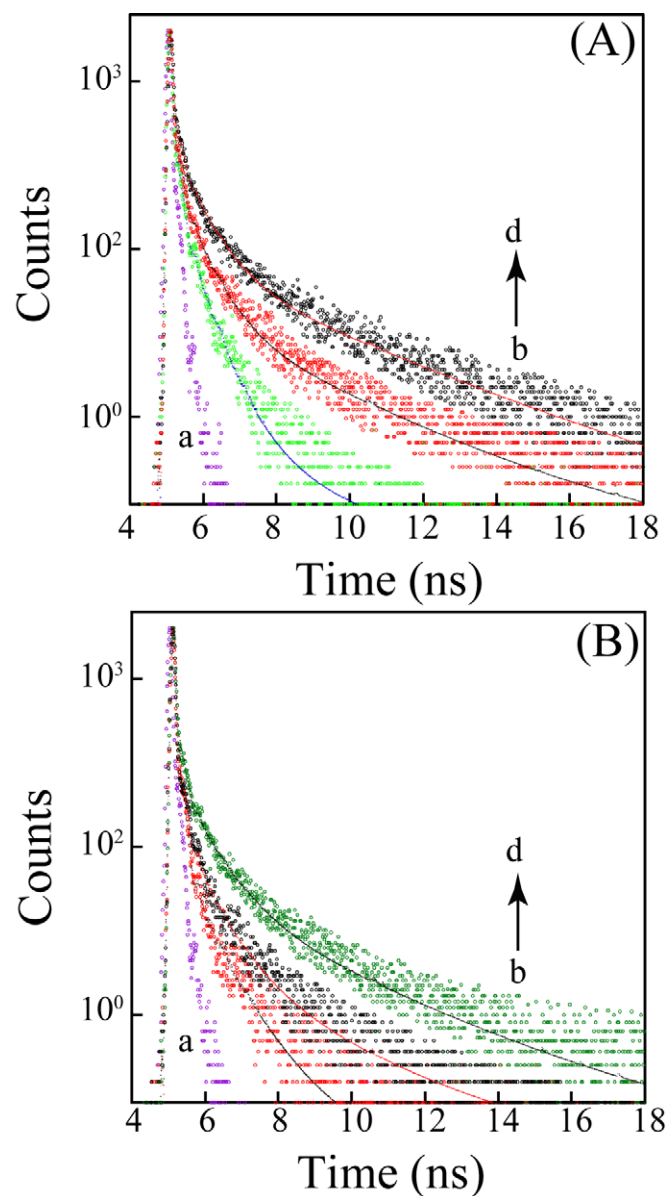

**Figure S12.** Time resolved fluorescence spectra of (A) Compound 1 and (B) Compound 2 in absence and in presence of BSA; Where Trace a: IRF, Trace b-d: Compound alone, Compound + BSA (250  $\mu\text{g/mL}$ ) and Compound + BSA (500  $\mu\text{g/mL}$ ) in an aqueous buffer of pH 7.0.

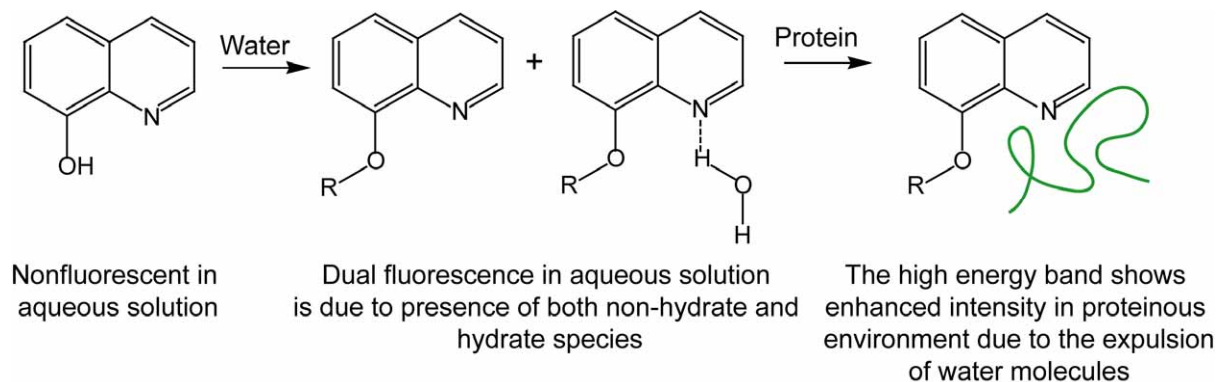

**Figure S13.** Photophysical responses of compound under different experimental conditions.

**Table S1.** Physical properties of the different proteins/enzymes.<sup>a</sup>

| Protein/Enzyme | Molecular weight (Da) | No. of amino acid residues | No. of aliphatic side chains (Ala, Ile, Leu & Val) | Aliphatic Index <sup>b</sup> |
|----------------|-----------------------|----------------------------|----------------------------------------------------|------------------------------|
| BSA            | 69323.4               | 607                        | Ala-47, Ile-15, Leu-65 & Val-38                    | 77.30                        |
| Amylase        | 55345.1               | 496                        | Ala-31, Ile-24, Leu-25 & Val-42                    | 69.33                        |
| Proteinase K   | 28934.9               | 129                        | Ala-33, Ile-11, Leu-14 & Val-19                    | 66.52                        |
| Lysozyme       | 14300.1               | 279                        | Ala-11, Ile-5, Leu-9 & Val-7                       | 66.59                        |
| AMG            | 12283.3               | 112                        | Ala-7, Ile-5, Leu-6 & Val-9                        | 67.86                        |

<sup>a</sup>Walker, John M. *The Proteomics Protocols Handbook*; Humana Press Inc: Totowa, NJ, 2005; <sup>b</sup>Ikai, A. J. *J. Biochem.* **1980**, *88*, 1895.

**Table S2.** Photophysical Properties of Compounds<sup>a</sup> in Presence of BSA

| Sample                     | $\tau_1$ (ns) | $\tau_2$ (ns) | $\tau_3$ (ns) | $\alpha_1$ | $\alpha_2$ | $\alpha_3$ | $\tau_m$ (ns) |
|----------------------------|---------------|---------------|---------------|------------|------------|------------|---------------|
| <b>1</b>                   | 0.016         | 0.434         | 3.554         | 0.604      | 0.026      | 0.004      | 0.056         |
| <b>2</b>                   | 0.009         | 0.385         | 1.134         | 1.143      | 0.869      | 0.002      | 0.016         |
| <b>3</b>                   | 0.004         | 0.644         | 2.760         | 1.743      | 0.005      | 0.004      | 0.012         |
| <b>1 + BSA<sup>b</sup></b> | 0.053         | 0.828         | 5.262         | 0.194      | 0.024      | 0.007      | 0.297         |
| <b>1 + BSA<sup>c</sup></b> | 0.087         | 1.087         | 5.831         | 0.133      | 0.026      | 0.007      | 0.483         |
| <b>2 + BSA<sup>b</sup></b> | 0.010         | 0.964         | 3.292         | 1.075      | 0.007      | 0.001      | 0.018         |
| <b>2 + BSA<sup>c</sup></b> | 0.013         | 0.748         | 4.699         | 0.836      | 0.010      | 0.003      | 0.038         |
| <b>3 + BSA<sup>b</sup></b> | 0.005         | 1.697         | 3.329         | 1.652      | 0.003      | 0.003      | 0.014         |
| <b>3 + BSA<sup>c</sup></b> | 0.012         | 0.882         | 4.121         | 0.878      | 0.006      | 0.002      | 0.028         |

<sup>a</sup>[Compound]: 50  $\mu$ M, <sup>b</sup>[BSA]: 250  $\mu$ g/mL and <sup>c</sup>[BSA]: 500  $\mu$ g/mL

## References

(1) Shchukina, M. N.; Savitskaya, N. V. S. Ordzhonikidze *All-Union Chem. Pharm. Inst.* Moscow, USSR. *Zhurnal Obshchei Khimii*, 1952, **22**, 1218.

(2) Andre, L.; Jean, S.; Farchid, V. Z. *Bull. Soc. Chim. Fr.* 1987, **6**, 1027.
